# Supplementary material
Source: PubMed Central journal article supplement (PMC6481186)
Supplement: NIHMS1022462-supplement.pdf [file NIHMS1022462-supplement.pdf]

Supporting information

**Identification of novel pathways in idelalisib metabolism and bioactivation**

Junjie Zhu,<sup>†</sup> Pengcheng Wang,<sup>†</sup> Amina I Shehu,<sup>†</sup> Jie Lu,<sup>†</sup> Huichang Bi,<sup>‡</sup>  
and Xiaochao Ma<sup>†,\*</sup>

<sup>†</sup>Center for Pharmacogenetics, Department of Pharmaceutical Sciences, School of Pharmacy, University of Pittsburgh, Pittsburgh, PA 15261, USA.

<sup>‡</sup>School of Pharmaceutical Science, Sun Yat-sen University, 132 Waihuandong Rd, University City of Guangzhou, Guangzhou 510006, China.

**Corresponding Author**

\*Xiaochao Ma, Ph.D., Center for Pharmacogenetics, Department of Pharmaceutical Sciences, School of Pharmacy, University of Pittsburgh, Pittsburgh, PA 15261. Tel. (412) 648-9448, E-mail: mxiaocha@pitt.edu.

## **Table of contents**

**Figure S1.** Relative abundance of ILB metabolites in the liver from mice treated with a low dose of ILB (36 mg/kg).

**Figure S2.** Metabolomic analysis of feces from mice treated with vehicle or ILB.

**Figure S3.** Metabolomic analysis of urine from mice treated with vehicle or ILB.

**Figure S4.** Trapping of M2, M3, M4 and M6 in HLM.

**Figure S5.** Identification of M4, M6, M15, M16 and M18.

**Figure S6.** Identification of M19 and M20.

**Figure S7.** Trapping of M15, M16, M18, M19, M20 and M21 in HLM.

**Figure S8.** Comparison of the metabolism of ILB and M1 between HLM and MLM.

**Figure S9.** Role of CYPs in M1 formation.

**Figure S10.** Proposed mechanisms for the formation ILB GSH adducts M2, M19 and M20.

**Table S1.** Summary of ILB metabolites.

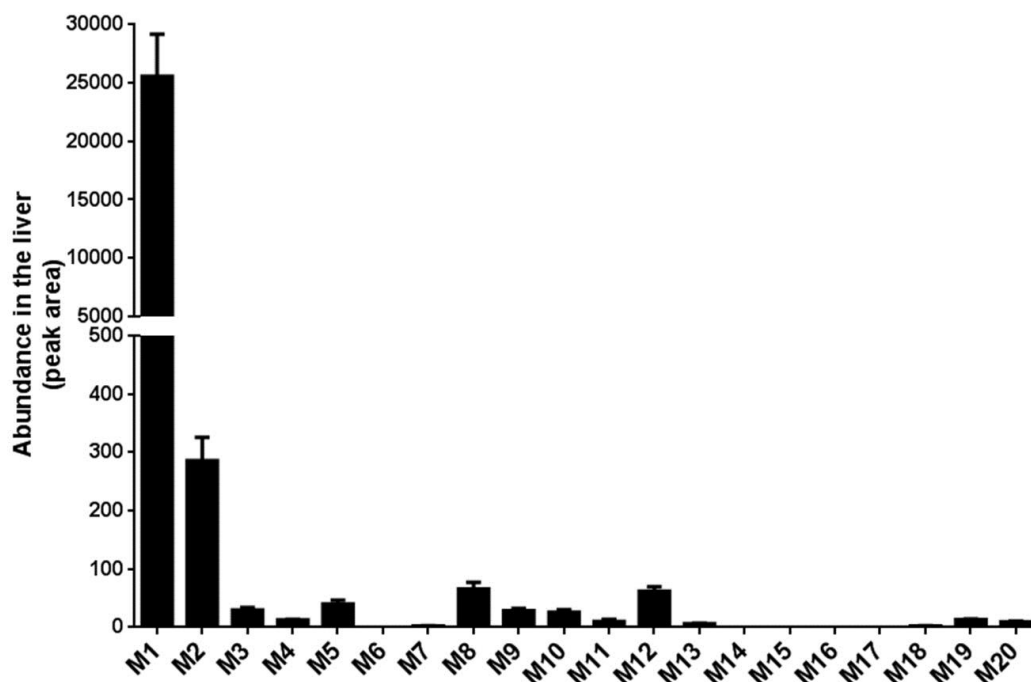

**Figure S1.** Relative abundance of ILB metabolites in the liver of mice treated with ILB (36 mg/kg, p.o.). The data are expressed as means  $\pm$  SEM (n = 4).

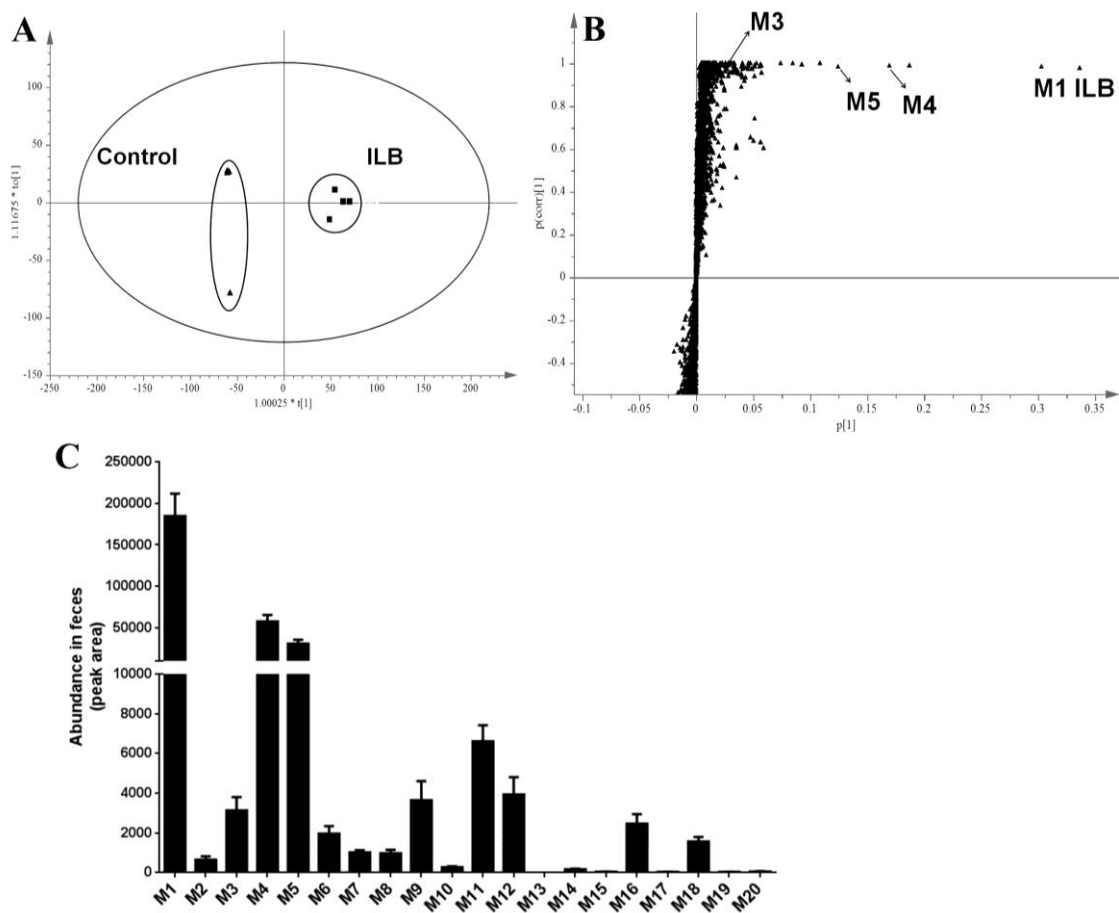

**Figure S2.** Metabolomic analysis of feces from mice treated with vehicle or ILB (100 mg/kg). All samples were analyzed by UPLC-QTOFMS. (A) Separation of fecal samples from control and ILB group in an OPLS-DA score plot. (B) Loading S-plot generated by OPLS-DA analysis. The top ranking ions were identified as ILB and its metabolites. (C) Relative abundance of ILB metabolites in feces. The data are expressed as means  $\pm$  SEM (n = 4).

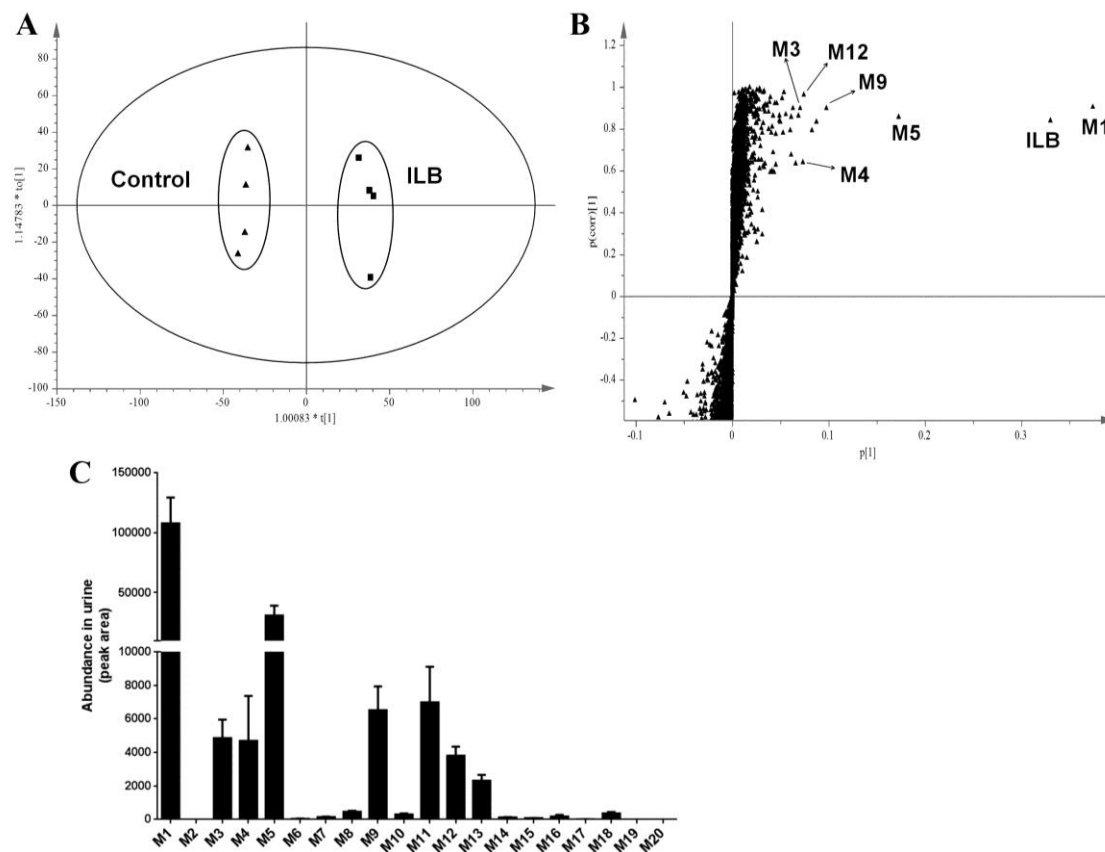

**Figure S3.** Metabolomic analysis of urine from mice treated with vehicle or ILB (100 mg/kg). All samples were analyzed by UPLC-QTOFMS. (A) Separation of urinary samples from control and ILB group in an OPLS-DA score plot. (B) Loading S-plot generated by OPLS-DA analysis. The top ranking ions were identified as ILB and its metabolites. (C) Relative abundance of metabolites of ILB in urine. The data are expressed as means  $\pm$  SEM (n = 4).

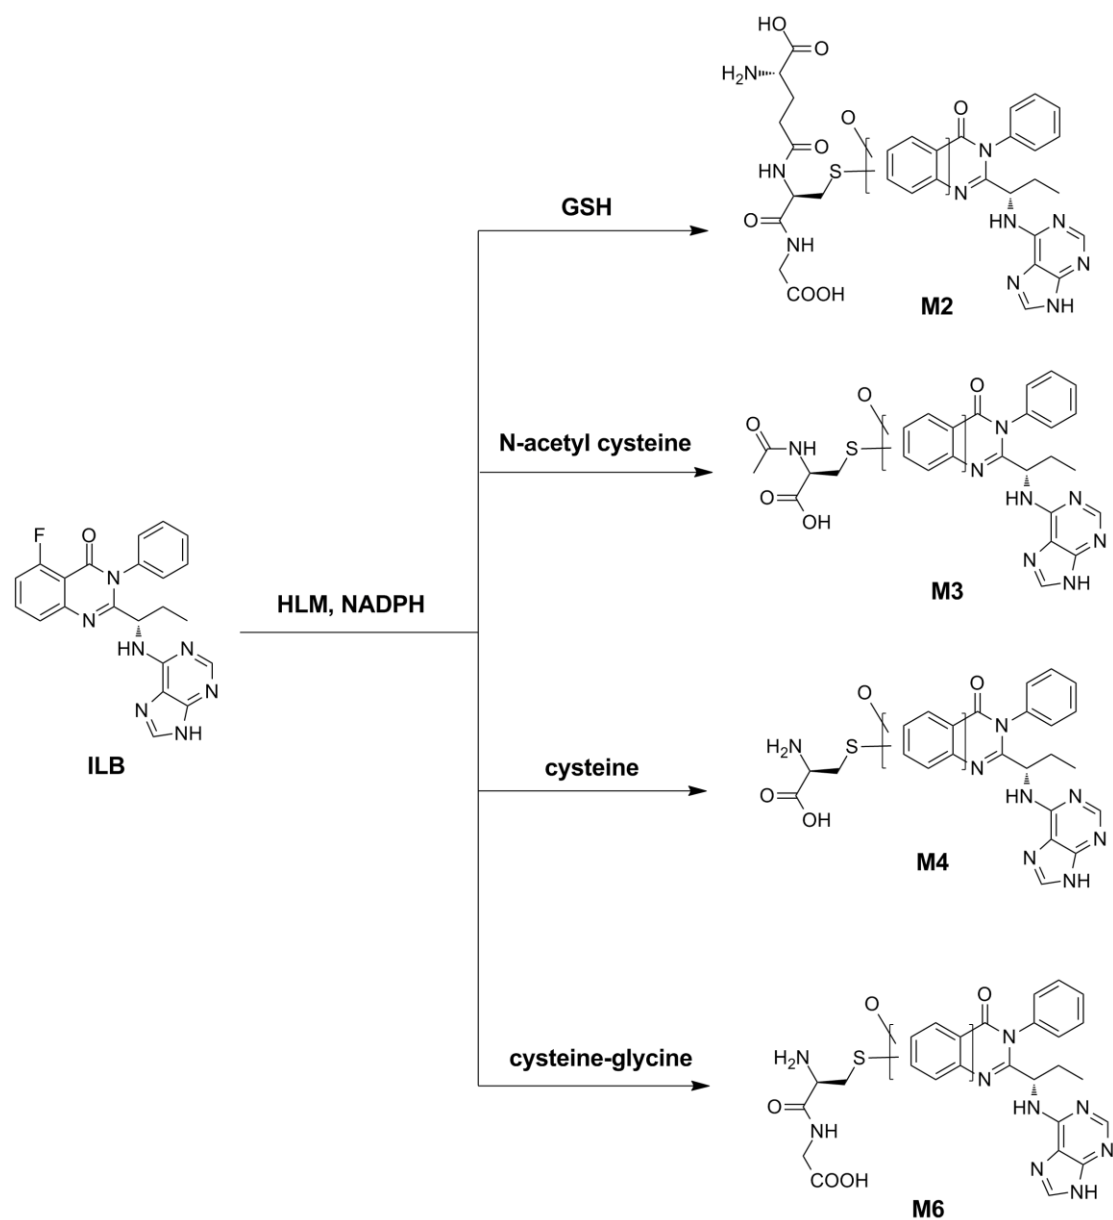

**Figure S4.** Trapping of M2, M3, M4 and M6 in HLM. M2, M3, M4 and M6 were recaptured by the incubation of ILB in HLM with trapping agents GSH, *N*-acetyl cysteine, cysteine and cysteine-glycine, respectively.

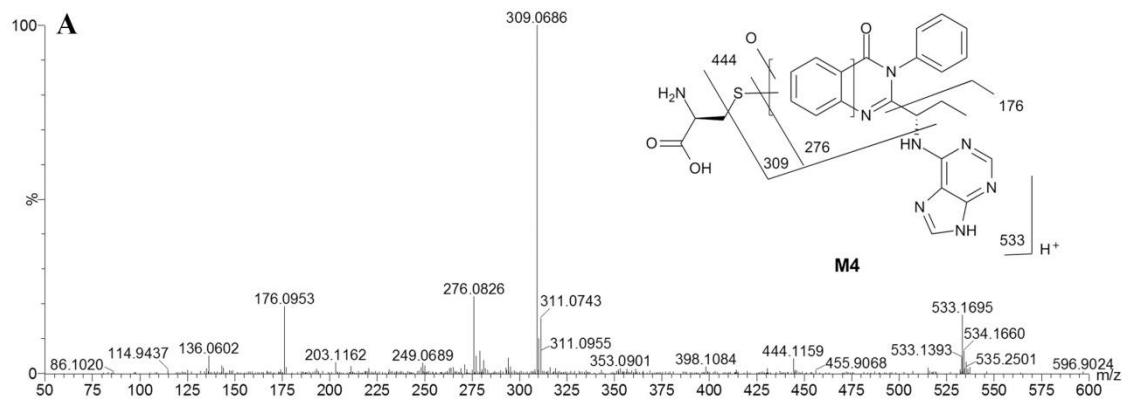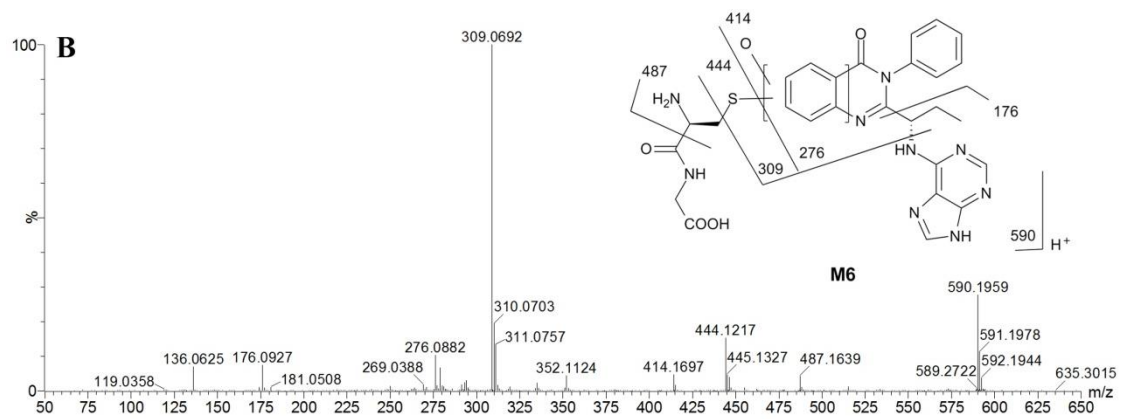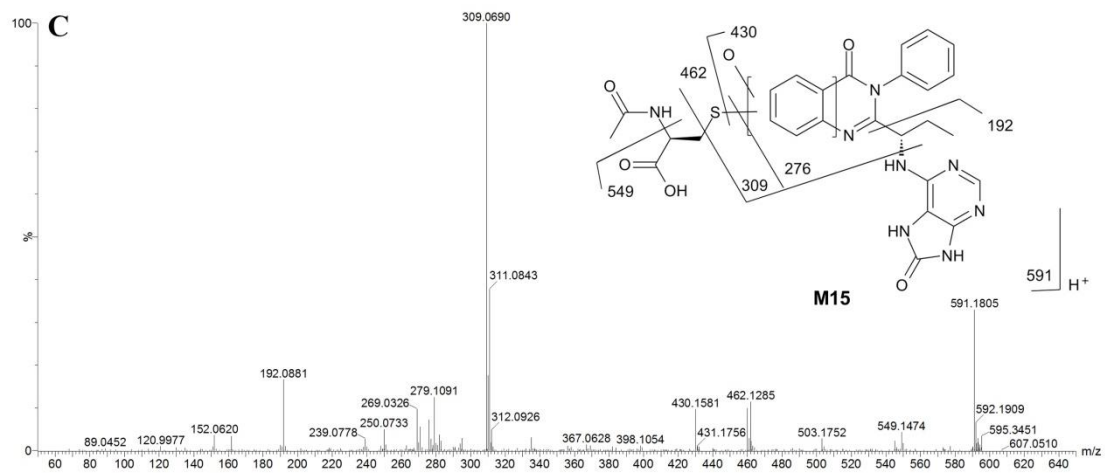

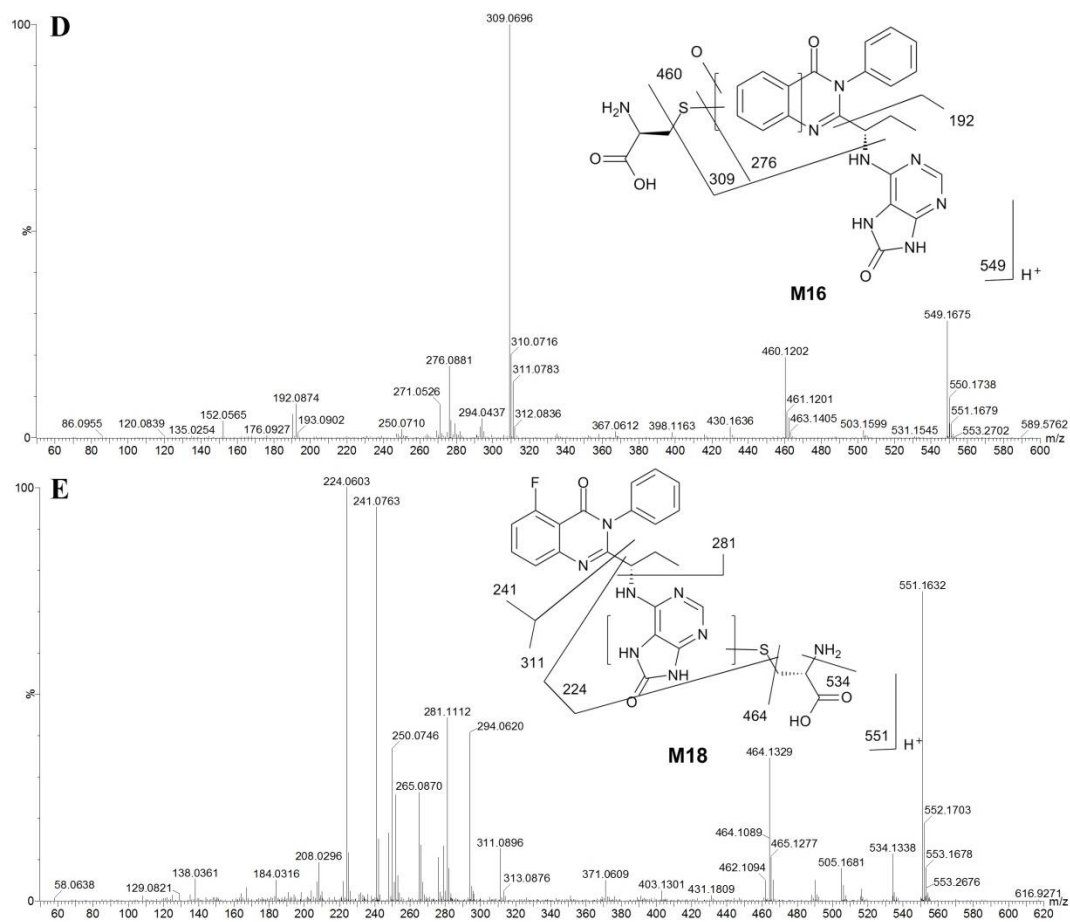

**Figure S5.** Identification of M4, M6, M15, M16 and M18. (A) MS/MS spectrum of M4. (B) MS/MS spectrum of M6. (C) MS/MS spectrum of M15. (D) MS/MS spectrum of M16. (E) MS/MS spectrum of M18.



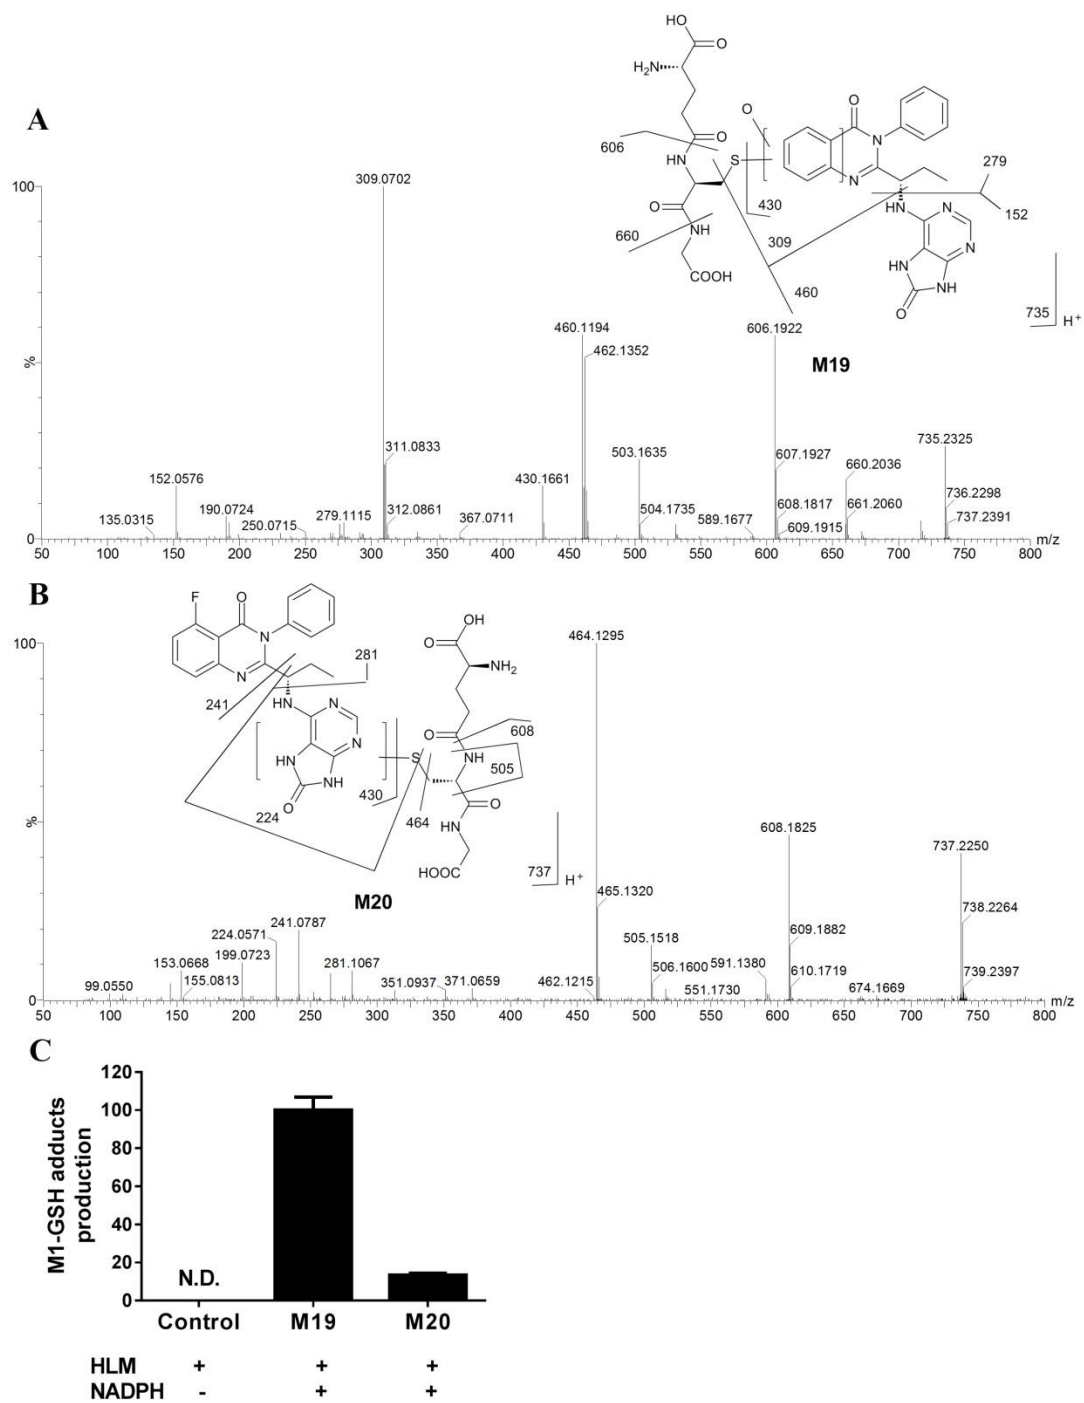

**Figure S6.** Identification of M19 and M20. (A) MS/MS spectrum of M19. (B) MS/MS spectrum of M20. (C) The abundance of M19 and M20 in the incubation of M1 with HLM. N.D., not detected. The abundance of M19 was set as 100%. All the data are expressed as means  $\pm$  SEM (n = 3).

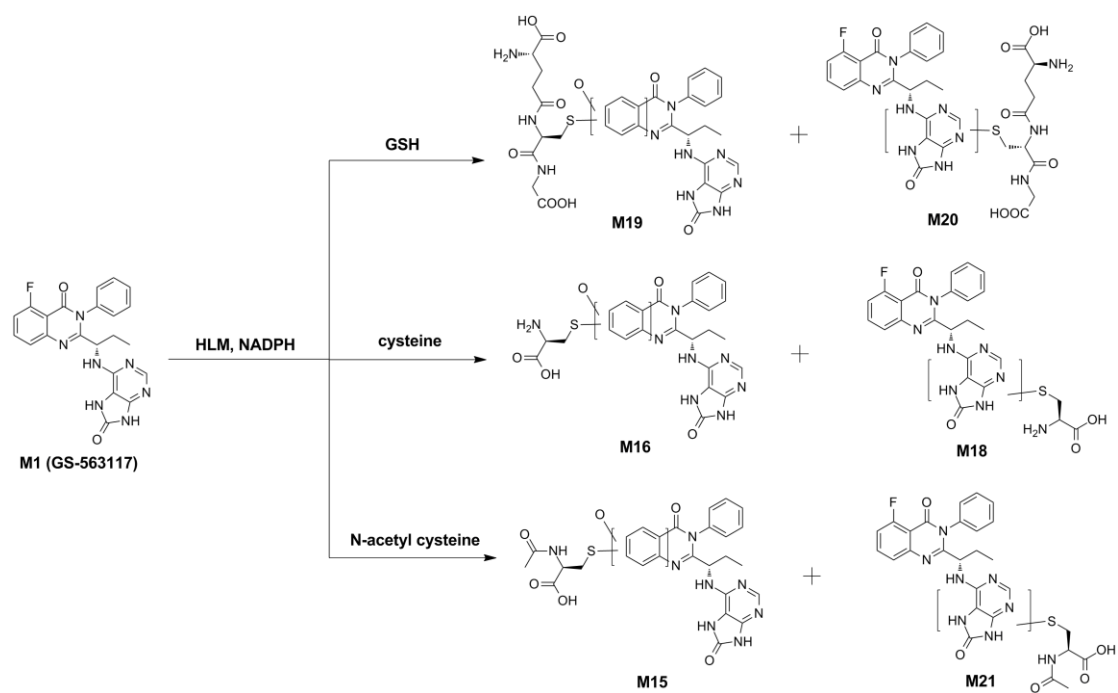

**Figure S7.** Trapping of M15, M16, M18, M19, M20 and M21 in HLM. M15, M16, M18, M19, M20 and M21 were recaptured by the incubation of M1 in HLM with trapping agents GSH, cysteine or *N*-acetyl cysteine.

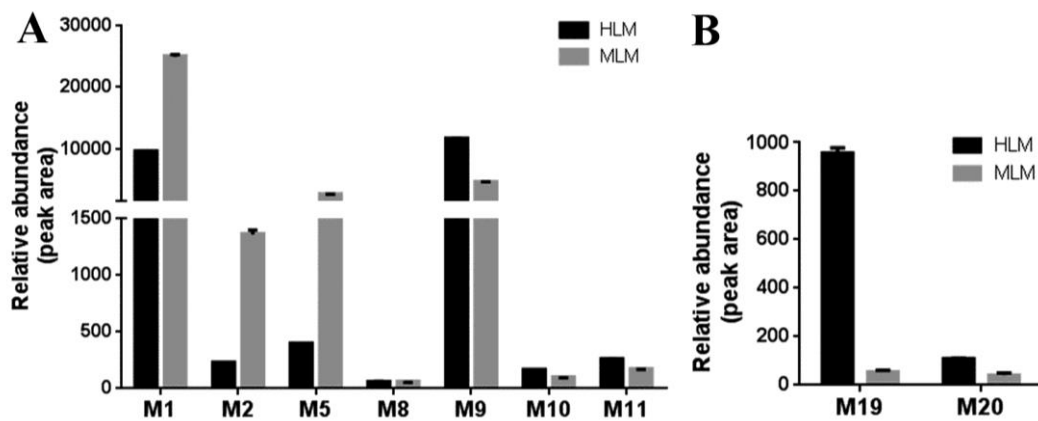

**Figure S8.** Comparison of the metabolism of ILB and M1 between HLM and MLM.

(A) Metabolites in the incubations of ILB with HLM or MLM. (B) Metabolites in the incubations of M1 with HLM or MLM. All the metabolites were analyzed by UPLC-QTOFMS. The data are expressed as means  $\pm$  SEM (n = 3).

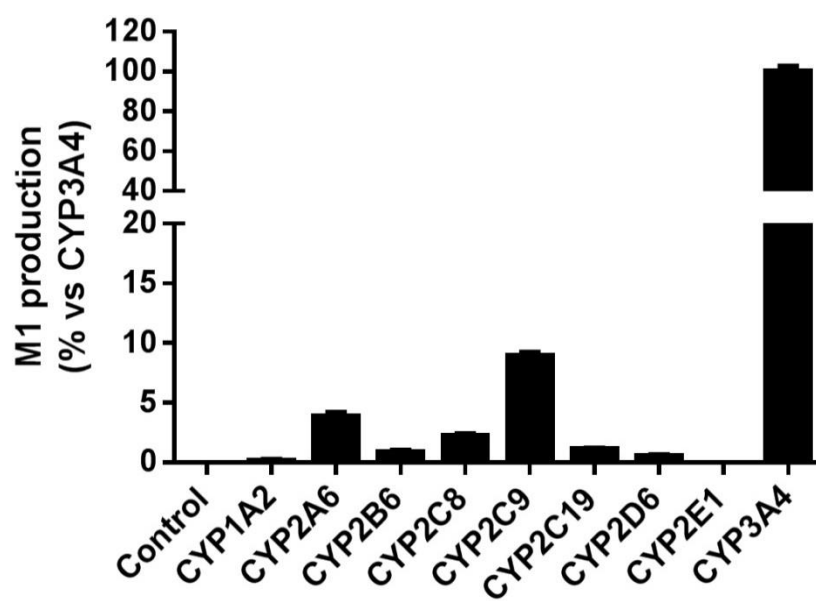

**Figure S9.** Role of CYPs in M1 formation. The relative abundance of M1 from the incubation with CYP3A4 was set as 100%. All the data are expressed as means  $\pm$  SEM (n = 3).

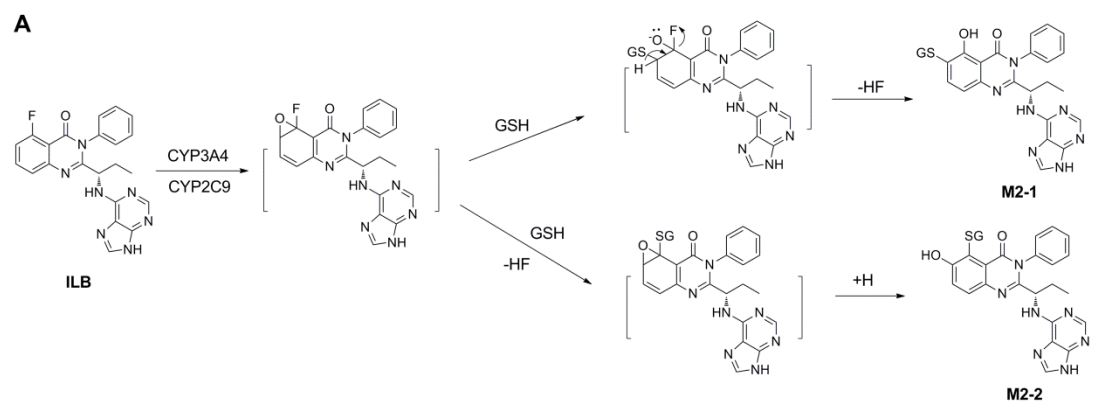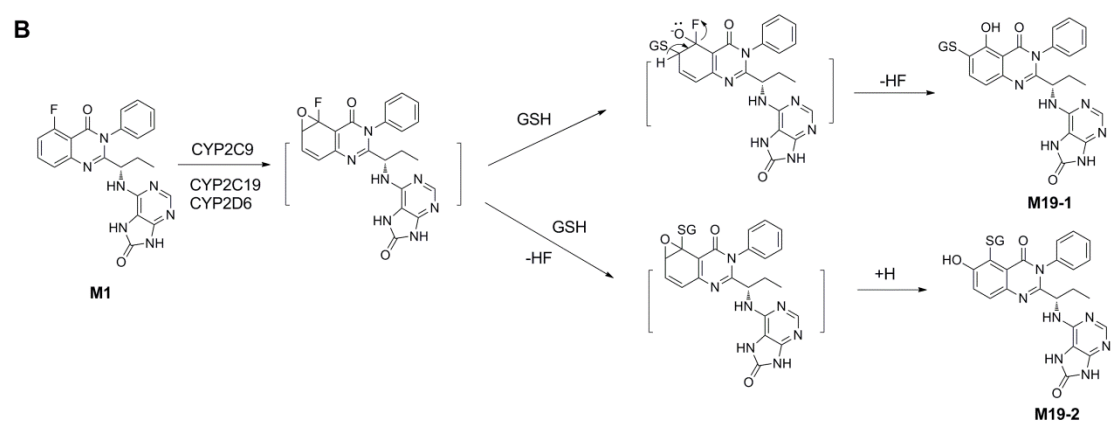

C

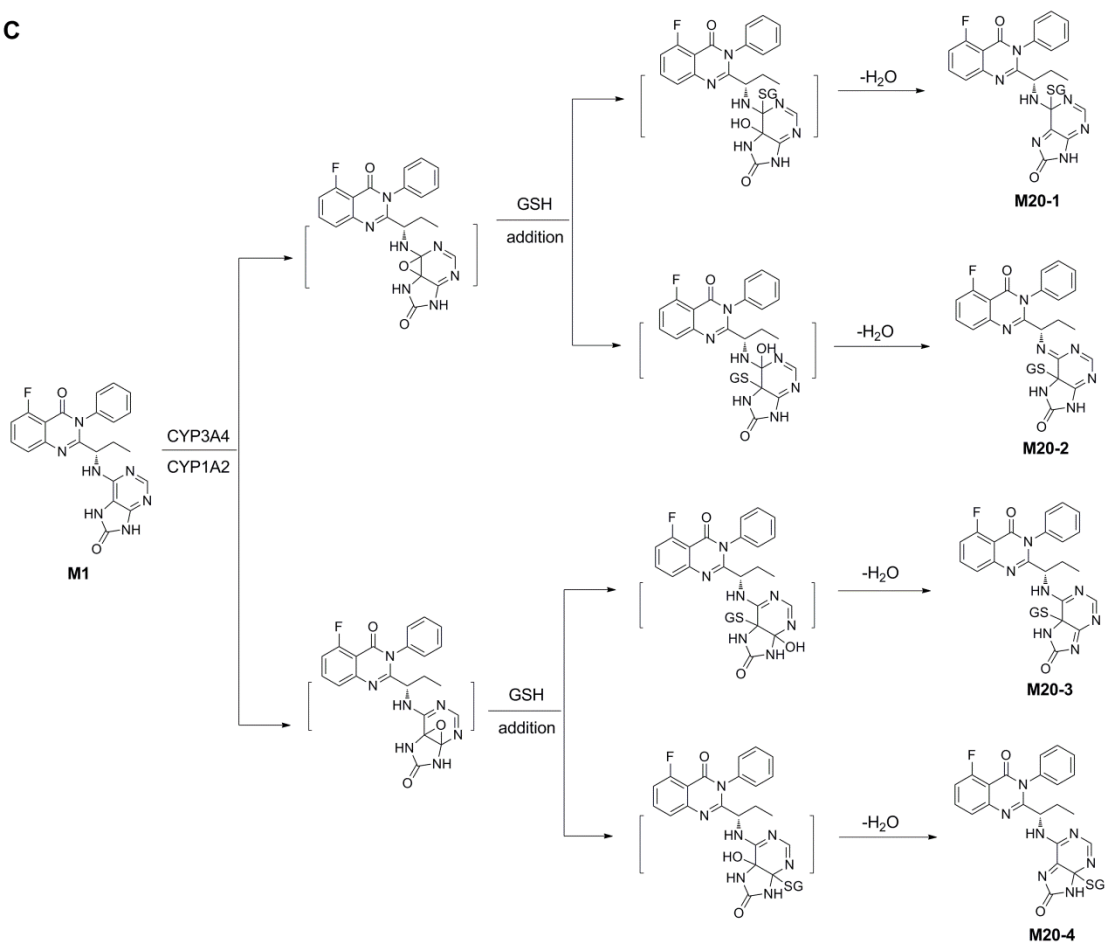

**Figure S10.** Proposed mechanisms for the formation of ILB GSH adducts M2 (A), M19 (B) and M20 (C).

**Table S1.** Summary of ILB metabolites. These metabolites were identified in the liver, fecal and urinary samples of mice treated with ILB. M1 and M2 are the major metabolites in mouse liver. Oxidized metabolites M1, M5, M8, M9, M10 and M11 were also detected in the incubation of ILB with HLM. M2, M3, M6, M15, M16, M19 and M20 are novel metabolites of ILB.

| RT<br>(min) | Observed<br>m/z [M + H] | Calculated<br>m/z [M + H] | Mass Error<br>(ppm) | Formula                                                          | Identification  | Metabolite<br>ID | Sources       |
|-------------|-------------------------|---------------------------|---------------------|------------------------------------------------------------------|-----------------|------------------|---------------|
| 5.28        | 416.1628                | 416.1635                  | -1.7                | C <sub>22</sub> H <sub>19</sub> FN <sub>7</sub> O                | ILB             | -                | L, S, F, U    |
| 5.46        | 432.1584                | 432.1584                  | 0                   | C <sub>22</sub> H <sub>19</sub> FN <sub>7</sub> O <sub>2</sub>   | ILB+O           | M1               | H, L, S, F, U |
| 4.48        | 719.2408                | 719.2360                  | 6.7                 | C <sub>32</sub> H <sub>35</sub> N <sub>10</sub> O <sub>8</sub> S | ILB-F+O+GSH     | M2               | H, L, S, F    |
| 5.20        | 575.1826                | 575.1825                  | 0.2                 | C <sub>27</sub> H <sub>27</sub> N <sub>8</sub> O <sub>5</sub> S  | ILB-F+O+NAC     | M3               | H, L, S, F, U |
| 4.31        | 533.1695                | 533.1719                  | -4.5                | C <sub>25</sub> H <sub>25</sub> N <sub>8</sub> O <sub>4</sub> S  | ILB-F+O+Cys     | M4               | H, L, S, F, U |
| 4.68        | 432.1566                | 432.1584                  | -4.2                | C <sub>22</sub> H <sub>19</sub> FN <sub>7</sub> O <sub>2</sub>   | ILB+O           | M5               | H, L, S, F, U |
| 4.38        | 590.1959                | 590.1934                  | 4.2                 | C <sub>27</sub> H <sub>28</sub> N <sub>9</sub> O <sub>5</sub> S  | ILB-F+O+Cys-Gly | M6               | H, F, U       |
| 6.45        | 460.1534                | 460.1556                  | -4.8                | C <sub>23</sub> H <sub>22</sub> N <sub>7</sub> O <sub>2</sub> S  | ILB-F+O+SMe     | M7               | L, S, F, U    |
| 5.86        | 414.1695                | 414.1678                  | 4.1                 | C <sub>22</sub> H <sub>19</sub> N <sub>7</sub> O <sub>2</sub>    | ILB-F+O         | M8               | H, L, S, F, U |
| 5.65        | 432.1585                | 432.1584                  | 0.2                 | C <sub>22</sub> H <sub>19</sub> FN <sub>7</sub> O <sub>2</sub>   | ILB+O           | M9               | H, L, S, F, U |

|      |          |          |      |                                                                   |              |     |               |
|------|----------|----------|------|-------------------------------------------------------------------|--------------|-----|---------------|
| 4.12 | 432.1563 | 432.1584 | -4.9 | C <sub>22</sub> H <sub>19</sub> FN <sub>7</sub> O <sub>2</sub>    | ILB+O        | M10 | H, L, S, F, U |
| 4.97 | 430.1618 | 430.1628 | -2.3 | C <sub>22</sub> H <sub>20</sub> N <sub>7</sub> O <sub>3</sub>     | ILB-F+2O     | M11 | H, L, F, U    |
| 5.01 | 608.1904 | 608.1905 | -0.2 | C <sub>28</sub> H <sub>27</sub> FN <sub>7</sub> O <sub>8</sub>    | ILB+O+Glu    | M12 | L, S, F, U    |
| 4.83 | 608.1921 | 608.1905 | 2.6  | C <sub>28</sub> H <sub>27</sub> FN <sub>7</sub> O <sub>8</sub>    | ILB+O+Glu    | M13 | L, U          |
| 5.12 | 592.1926 | 592.1956 | -5.1 | C <sub>28</sub> H <sub>27</sub> FN <sub>7</sub> O <sub>7</sub>    | ILB+Glu      | M14 | S, F, U       |
| 5.38 | 591.1805 | 591.1774 | 5.2  | C <sub>27</sub> H <sub>27</sub> N <sub>8</sub> O <sub>6</sub> S   | ILB-F+2O+NAC | M15 | H, F, U       |
| 4.50 | 549.1675 | 549.1669 | 1.1  | C <sub>25</sub> H <sub>25</sub> N <sub>8</sub> O <sub>5</sub> S   | ILB-F+2O+Cys | M16 | H, F, U       |
| 6.55 | 476.1466 | 476.1505 | -8.2 | C <sub>23</sub> H <sub>22</sub> N <sub>7</sub> O <sub>3</sub> S   | ILB-F+2O+SMe | M17 | F, U          |
| 4.60 | 551.1632 | 551.1625 | 1.3  | C <sub>25</sub> H <sub>24</sub> FN <sub>8</sub> O <sub>4</sub> S  | ILB+O+Cys    | M18 | H, L, F, U    |
| 4.69 | 735.2325 | 735.2309 | 2.2  | C <sub>32</sub> H <sub>35</sub> N <sub>10</sub> O <sub>9</sub> S  | ILB-F+2O+GSH | M19 | H, L, F       |
| 4.61 | 737.2250 | 737.2266 | -2.2 | C <sub>32</sub> H <sub>34</sub> FN <sub>10</sub> O <sub>8</sub> S | ILB+O+GSH    | M20 | H, L, F       |

+O: monooxidation; -F: defluorination; +SMe: methylthio adduct; Glu: glucuronide; +2O: dioxidation; +Cys: cysteine adduct; +GSH: GSH adduct; +Cys-Gly: cysteine-glycine adduct; +NAC: *N*-acetyl cysteine adduct; H: human liver microsomes; L: mouse liver; S: mouse serum; F: mouse feces; U: mouse urine; RT: retention time; ppm: parts per million.
